# Supplementary material for: Global changes in gene expression associated with phenotypic switching of wild yeast
Source: PubMed Central journal article supplement (PMC3930820; doi:10.1186/1471-2164-15-136), 2014-02-17
Supplement: 1471-2164-15-136-S2.pdf [file 1471-2164-15-136-S2.pdf]

Table S2. **List of strains used in this study.**

| <b>strain</b>                  | <b>genotype</b>                                                                       | <b>reference</b>      |
|--------------------------------|---------------------------------------------------------------------------------------|-----------------------|
| BR-F                           | MATa/MAT $\alpha$                                                                     | (Kuthan et al., 2003) |
| BR-S                           | MATa/MAT $\alpha$                                                                     | (Kuthan et al., 2003) |
| BR-F-RF                        | MATa/MAT $\alpha$                                                                     | this study            |
| BR-F-Flo11p-GFP                | MATa/MAT $\alpha$ <i>FLO11/FLO11-EGFP</i>                                             | this study            |
| BR-F-RF-Flo11p-GFP             | MATa/MAT $\alpha$ <i>FLO11/FLO11-EGFP</i>                                             | this study            |
| BR-F-RF-p <sub>GAL1</sub> -GFP | MATa/MAT $\alpha$ <i>HIS3/his3<math>\Delta</math>::nat1-p<sub>GAL1</sub>-GFP</i>      | this study            |
| BR-F- <i>sir2</i>              | MATa/MAT $\alpha$ <i>sir2<math>\Delta</math>::kanMX/sir2<math>\Delta</math>::nat1</i> | this study            |
| BR-S- <i>hda1</i>              | MATa/MAT $\alpha$ <i>hda1<math>\Delta</math>::kanMX/hda1<math>\Delta</math>::nat1</i> | this study            |

Table S3. List of primers and plasmids used in the strain construction.

| primer                           | sequence                                                                      | purpose                                                 |
|----------------------------------|-------------------------------------------------------------------------------|---------------------------------------------------------|
| <b>SIR2-del-for</b>              | AGACACATTCAAACCATTTTTCCCTCATCGGCACATT<br>AAAGCTGGCAGCTGAAGCTTCGTACGC          | deletion of <i>SIR2</i> gene                            |
| <b>SIR2-del-rev</b>              | ATTGATATTAATTTGGCACTTTTAAATTATTAATTGC<br>CTTCTACGCATAGGCCACTAGTGGATCTG        | deletion of <i>SIR2</i> gene                            |
| <b>HDA1-del-for</b>              | GAGAAAGGGAAAGTTGAGCACTGTAATACGCCGAAC<br>AGATTAAGCCAGCTGAAGCTTCGTACGC          | deletion of <i>HDA1</i> gene                            |
| <b>HDA1-del-rev</b>              | TTCTTCATCACTCCATTCTTCAAACGAATCCAGTATA<br>AAGTCTGTGCATAGGCCACTAGTGGATCTG       | deletion of <i>HDA1</i> gene                            |
| <b>FLO11-eGFP-for</b>            | GCTTATTTGGTCCTTTTCGCTTCTATTTAACTCGGCTT<br>TGGGTTTTTGCAGGTCGACAACCCTTAAT       | internal fusion of GFP with <i>FLO11</i> gene           |
| <b>FLO11-eGFP-rev</b>            | ACAGCTAGTTCCTTCGGAGGATCCTCTTGGAAGTAG<br>TGCAGTTGGGCGGCCGCATAGGCCACT           | internal fusion of GFP with <i>FLO11</i> gene           |
| <b>P<sub>GAL1</sub>-eGFP-for</b> | CTTCGAAGAATATACTAAAAAATGAGCAGGCAAGATA<br>AACGAAGGCAAAGATGCGTACGCTGCAGGTCGAC   | P <sub>GAL1</sub> -GFP cassette for genomic integration |
| <b>P<sub>GAL1</sub>-eGFP-rev</b> | TATACACATGTATATATATCGTATGCTGCAGCTTTAA<br>ATAATCGGTGTCACACTACGATGAATTCTCTGTCTG | P <sub>GAL1</sub> -GFP cassette for genomic integration |

  

| plasmid | application                      | reference                      |
|---------|----------------------------------|--------------------------------|
| pAG25   | deletion cassette (nat marker)   | (Goldstein and McCusker, 1999) |
| pUG6    | deletion cassette (kanMX marker) | (Guedener et al., 2002)        |
| pYM-N25 | P <sub>GAL1</sub> -GFP cassette  | (Janke et al., 2004)           |
| pOM40   | internal GFP fusion              | (Gauss et al., 2005)           |
| pSH65   | marker excision                  | (Gauss et al., 2005)           |

Table S4. List of primers used in qPCR.

| Primer | ORF     | Gene        | Sequence             | Tm   | % GC | nt |
|--------|---------|-------------|----------------------|------|------|----|
| MAM3Fd | YOL060C | <i>MAM3</i> | tctagggatggtgccgattc | 64.3 | 50   | 20 |
| MAM3Rv | YOL060C | <i>MAM3</i> | tacaccaccagcagcacta  | 64.8 | 55   | 20 |
| SHR5Fd | YOL110W | <i>SHR5</i> | cgtctcgctctgtcagaat  | 65   | 55   | 20 |
| SHR5Rv | YOL110W | <i>SHR5</i> | ccgaacacctcaccttcttc | 64.1 | 55   | 20 |
| TOA1Fd | YOR194C | <i>TOA1</i> | acaaaggcgagatggaaatg | 64.3 | 45   | 20 |
| TOA1Rv | YOR194C | <i>TOA1</i> | tatacccactccgcttcac  | 64.2 | 55   | 20 |
| CLP1Fd | YOR250C | <i>CLP1</i> | gtcaaggtaaactcgggcat | 63.2 | 50   | 20 |
| CLP1Rv | YOR250C | <i>CLP1</i> | tcgacagcgtatatgggaaa | 63.4 | 45   | 20 |
| MPD1Fd | YOR288C | <i>MPD1</i> | agcttcgataaagcgatcca | 64   | 45   | 20 |
| MPD1Rv | YOR288C | <i>MPD1</i> | gccttgcggaacgtactaga | 64.5 | 55   | 20 |

Fd: forward primer, Rv: reverse primer, Tm: melting temperature, nt: nucleotides

## Supplemental references

Gauss, R., Trautwein, M., Sommer, T., and Spang, A. (2005) New modules for the repeated internal and N-terminal epitope tagging of genes in *Saccharomyces cerevisiae*. *Yeast* **22**: 1-12.

Goldstein, A.L., and McCusker, J.H. (1999) Three new dominant drug resistance cassettes for gene disruption in *Saccharomyces cerevisiae*. *Yeast* **15**: 1541-1553.

Gueldener, U., Heinisch, J., Koehler, G.J., Voss, D., and Hegemann, J.H. (2002) A second set of loxP marker cassettes for Cre-mediated multiple gene knockouts in budding yeast. *Nucleic Acids Res* **30**: e23.

Janke, C., Magiera, M.M., Rathfelder, N., Taxis, C., Reber, S., Maekawa, H. et al. (2004) A versatile toolbox for PCR-based tagging of yeast genes: new fluorescent proteins, more markers and promoter substitution cassettes. *Yeast* **21**: 947-962.

Kuthan, M., Devaux, F., Janderová, B., Slaninová, I., Jacq, C., and Palková, Z. (2003) Domestication of wild *Saccharomyces cerevisiae* is accompanied by changes in gene expression and colony morphology. *Mol Microbiol* **47**: 745-754.
